# Supplementary material for: Dietary inflammatory index and renal cancer risk: a prospective study
Source: Royal Society of Chemistry journal article supplement (doi:10.1039/d3fo02158k), 2023-01-01
Supplement: d3fo02158k1.pdf [file d3fo02158k1.pdf]

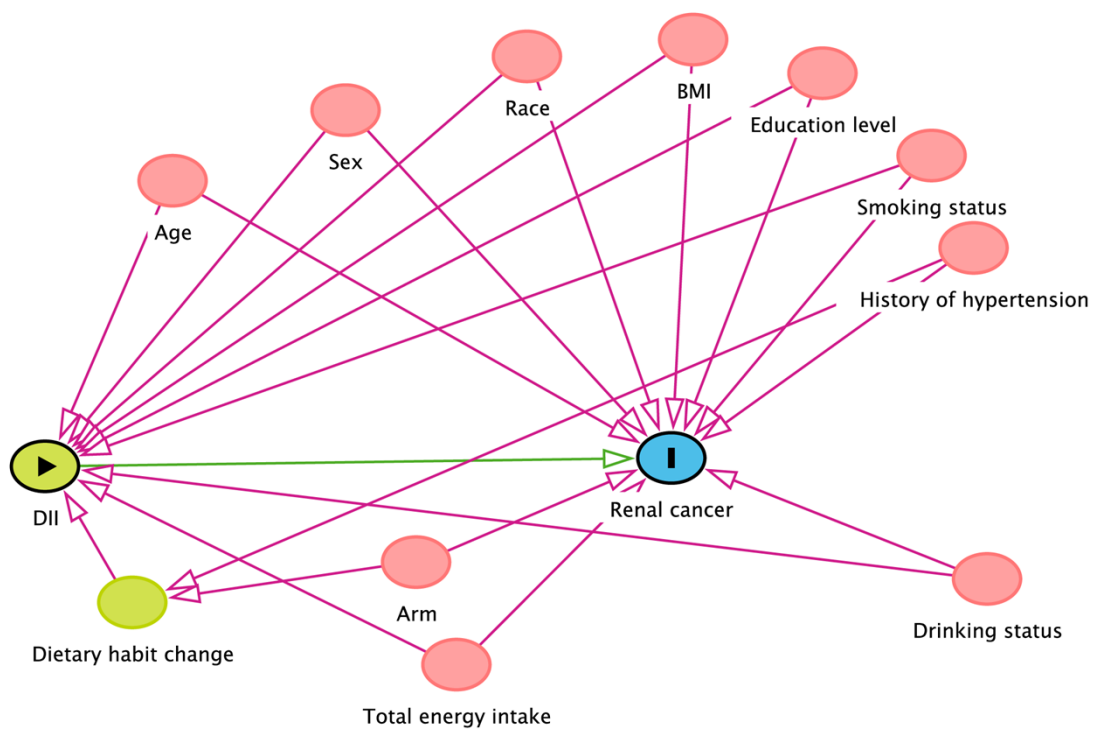

Supplemental Figure 1. Directed acyclic graph (DAG) showing causal assumptions on the effect of DII (exposure) on renal cancer (outcome). Based on DAGitty version 3.1 (Johannes Textor, Nijmegen, the Netherlands). DII, dietary inflammatory index; BMI, body mass index.
